# Supplementary material
Source: Springer Nature journal article supplement (https://www.springermedizin.de/resource/supplementary/12885_2010_2537_MOESM2_ESM.pdf/9462450)

no. of migrating cells

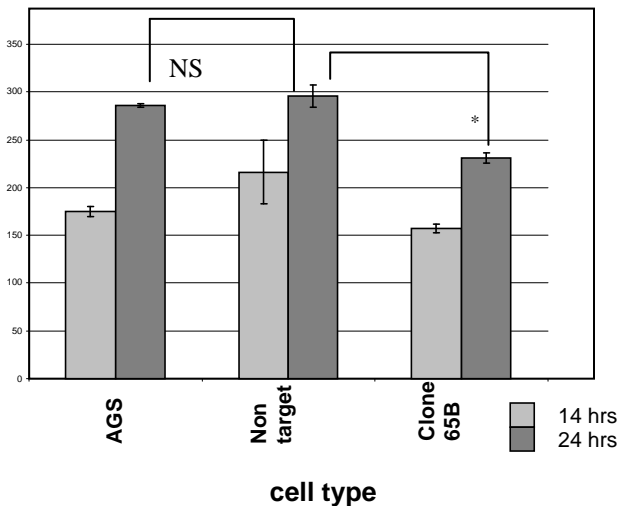

No. of invading cells

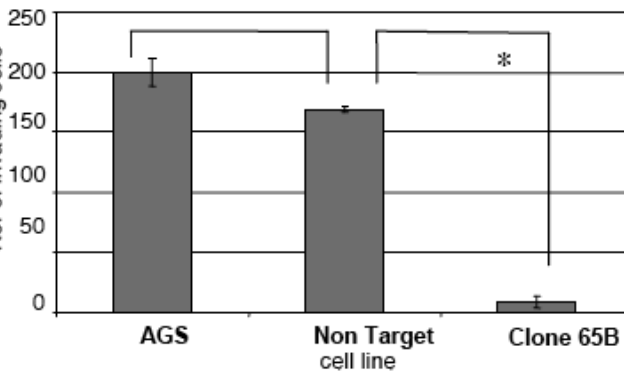

Supplement: MOESM2 [file 9462450]
